# Supplementary material
Source: PubMed Central journal article supplement (PMC3555535)
Supplement: supp_mcs283_mcs283supp.pdf [file supp_mcs283_mcs283supp.pdf]

## SUPPLEMENTARY DATA

FIG. S1. Unrooted UPGMA tree constructed using Euclidian genetic distances (Rogers, 1972), based on 13 microsatellite markers, to show the genetic relationships among 81 African and Indian Ocean *Coffea* populations. The tree was obtained from 500 bootstrap iterations. Key: West and West-Central Africa (W/WCA) = pink; East Africa (EA) = green; Madagascar (MAD) = dark blue; Mascarenes including the Comoros (MAS) = black. Species/population names are according to the Appendix in the text.

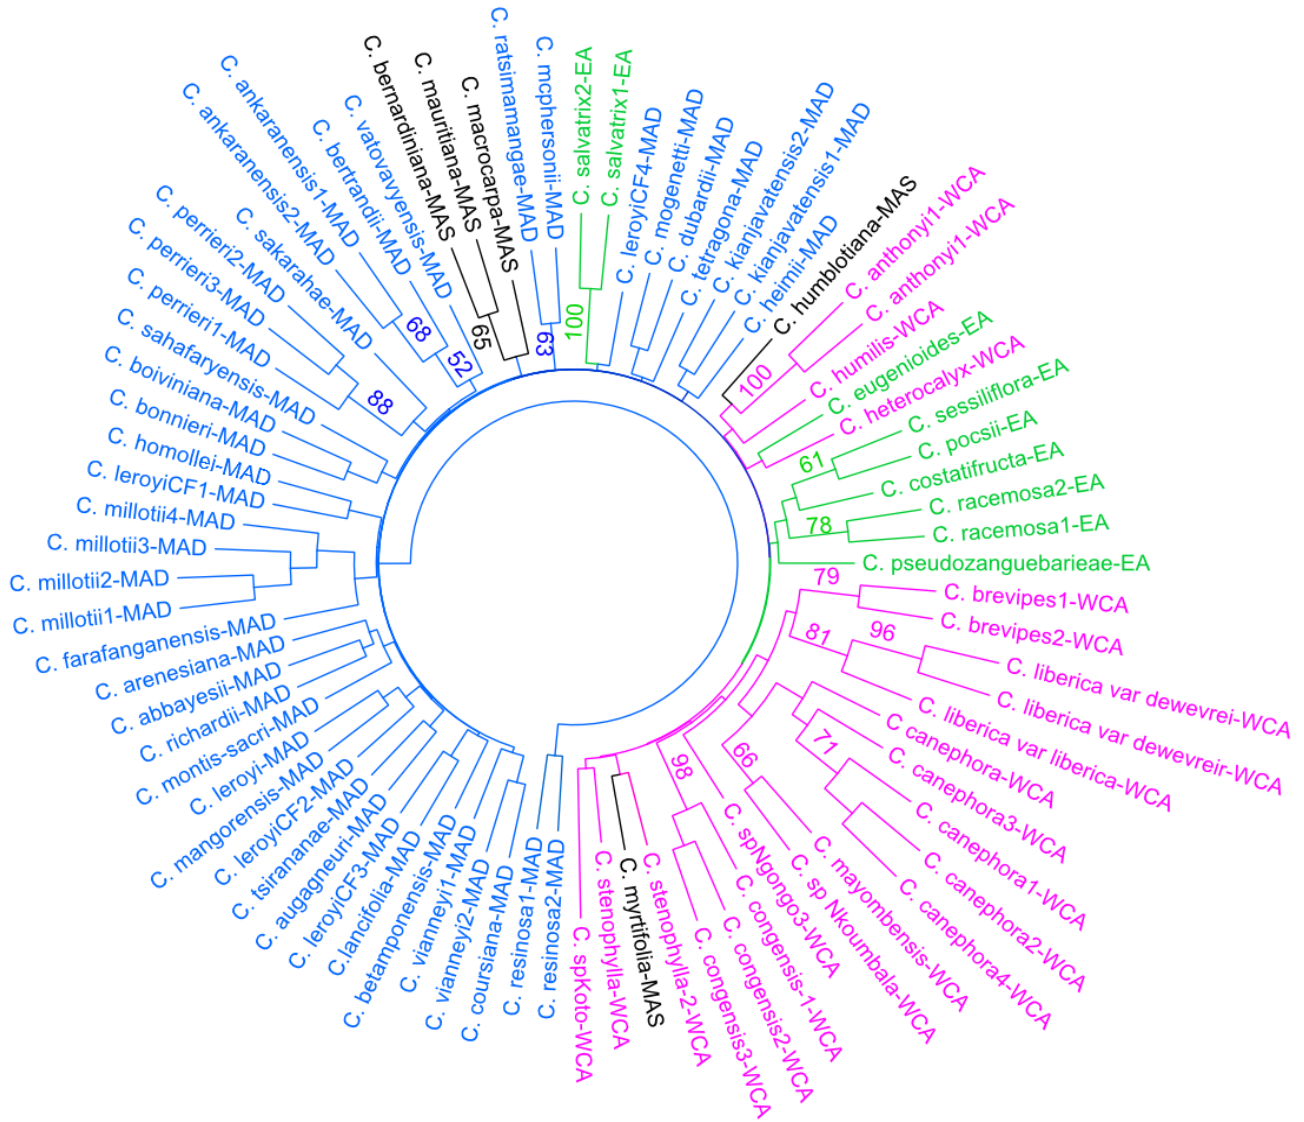

FIG. S2. Relationship between  $K$ -value and delta- $K$  by (A, B) regions and (C–H) sub-regions. The delta- $K$  value was calculated according to Evanno *et al.* (2005). The best  $K$ -value is given by the highest delta- $K$  value.

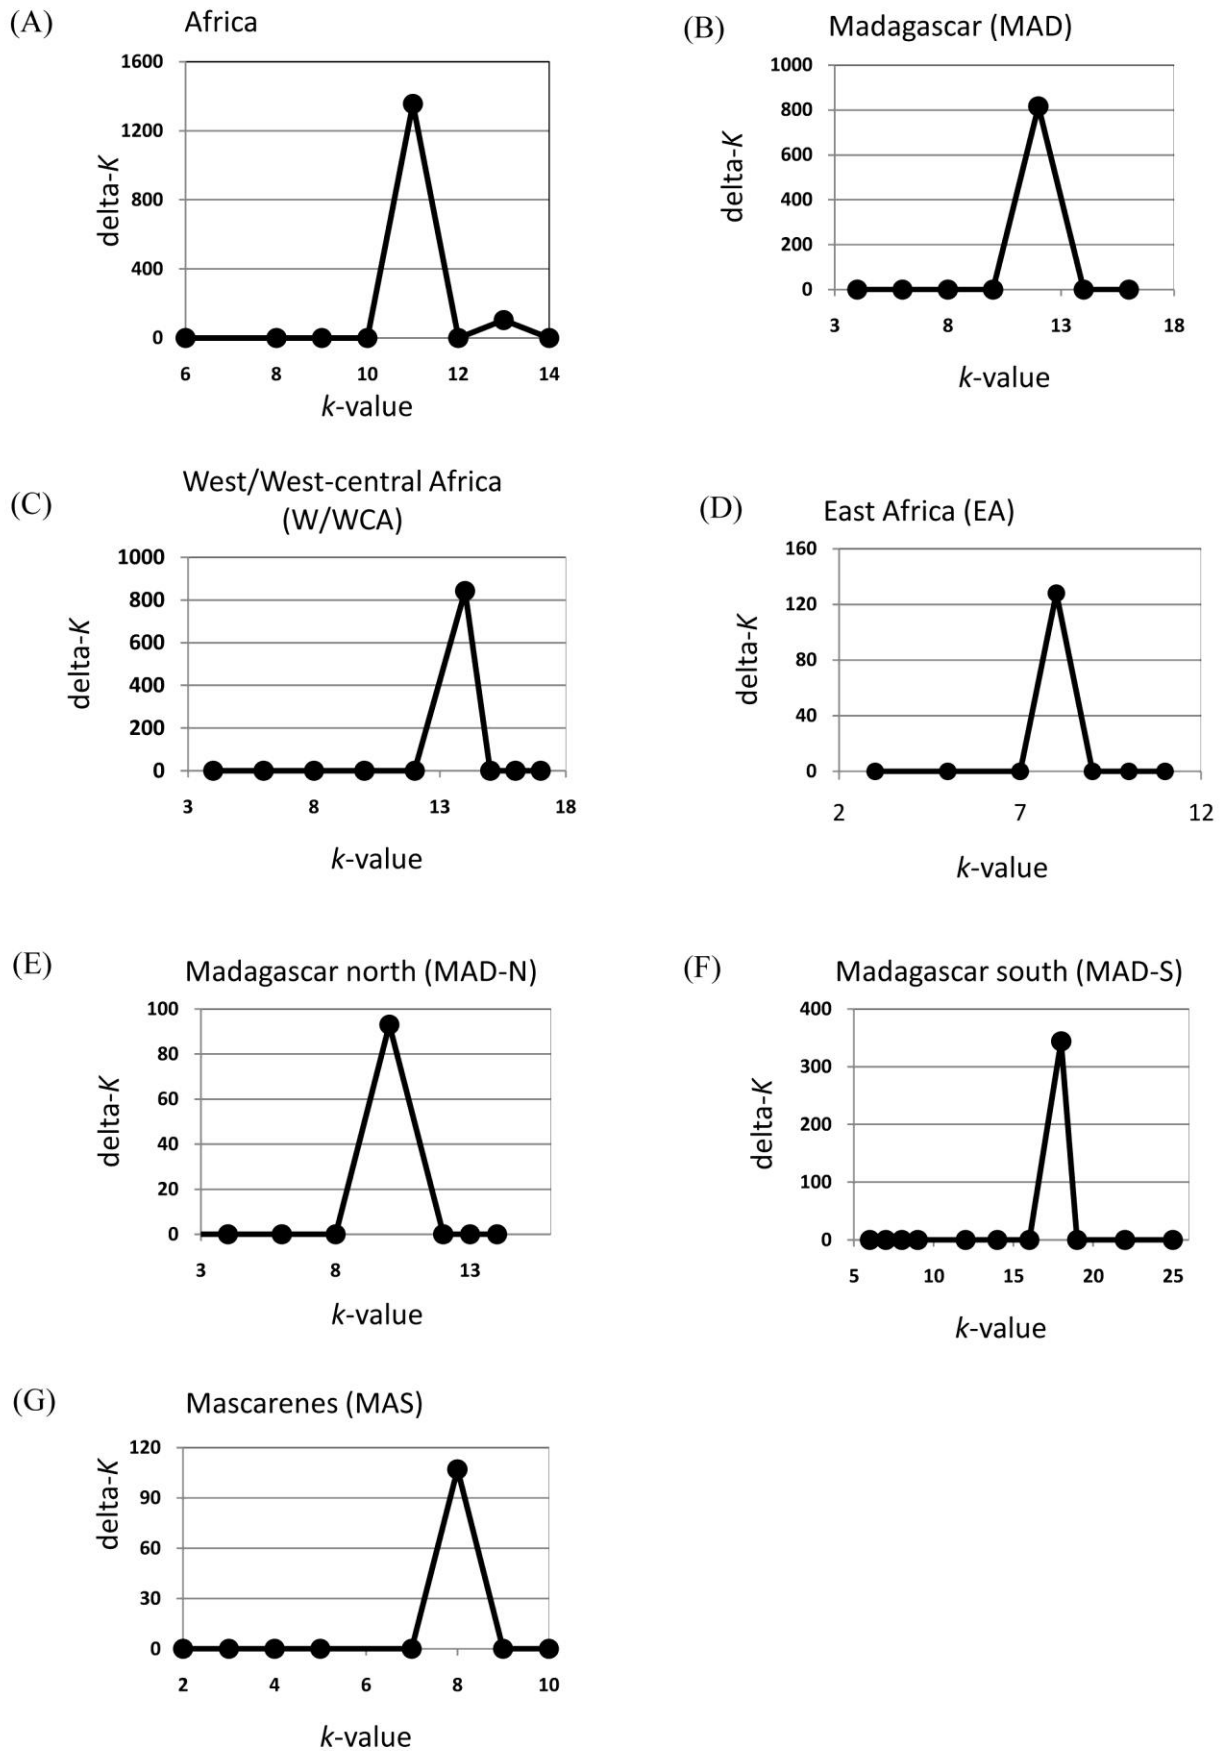

TABLE S1. Species' genetic parameters for each region or sub-region.  $A_{N,Total}$ : total number of alleles;  $A_N$ : number of alleles;  $A_{N,e}$ : efficient alleles;  $H_o$ : observed heterozygosity;  $H_e$ : expected heterozygosity;  $rb$ : null alleles. Regions and sub-regions: West and West-Central Africa (W/WCA); East Africa (EA); Indian Ocean Island Madagascar north (IOI: MAD-N); Indian Ocean Island Madagascar south (IOI: MAD-S); Indian Ocean Island Mascarenes (IOI:MAS).

| Species                       | Region/sub-region | $A_{N,Total}$ | $A_N$ | $A_{N,e}$ | $H_o$ | $H_e$ | $F$   | $rb$  |
|-------------------------------|-------------------|---------------|-------|-----------|-------|-------|-------|-------|
| <i>C. costatifructa</i>       | EA                | 7.3           | 2.38  | 1.78      | 0.31  | 0.39  | 0.13  | 0.05  |
| <i>C. eugenoides</i>          | EA                | 10.23         | 2.54  | 1.74      | 0.28  | 0.35  | 0.19  | 0.05  |
| <i>C. pocsii</i>              | EA                | 8.85          | 2.00  | 1.38      | 0.16  | 0.24  | 0.44  | 0.06  |
| <i>C. pseudozanguebarieae</i> | EA                | 13.62         | 2.69  | 1.92      | 0.47  | 0.41  | -0.13 | -0.04 |
| <i>C. racemosa1</i>           | EA                | 7.54          | 2.38  | 1.88      | 0.34  | 0.37  | 0.07  | 0.02  |
| <i>C. racemosa2</i>           | EA                | 9.15          | 2.92  | 2.20      | 0.37  | 0.48  | 0.27  | 0.08  |
| <i>C. salvatrix</i>           | EA                | 13.54         | 2.31  | 1.61      | 0.29  | 0.27  | -0.02 | -0.01 |
| <i>C. sessiliflora</i>        | EA                | 9.38          | 2.15  | 1.68      | 0.19  | 0.29  | 0.48  | 0.07  |
| <i>C. ankaranensis1</i>       | IOI : MAD-N       | 4.62          | 2.31  | 1.91      | 0.45  | 0.36  | -0.26 | -0.06 |
| <i>C. augagneuri</i>          | IOI : MAD-N       | 7.31          | 2.77  | 2.26      | 0.43  | 0.50  | 0.11  | 0.04  |
| <i>C. bonnieri</i>            | IOI : MAD-N       | 9.77          | 2.62  | 1.94      | 0.29  | 0.41  | 0.23  | 0.08  |
| <i>C. dubardii</i>            | IOI : MAD-N       | 9.62          | 2.38  | 1.90      | 0.38  | 0.35  | -0.11 | -0.02 |
| <i>C. heimii</i>              | IOI : MAD-N       | 9.69          | 2.15  | 1.53      | 0.28  | 0.27  | -0.03 | 0.00  |
| <i>C. mcphersonii</i>         | IOI : MAD-N       | 8.92          | 2.62  | 1.97      | 0.30  | 0.38  | 0.19  | 0.05  |
| <i>C. ratsimamangae</i>       | IOI : MAD-N       | 5.54          | 2.15  | 1.84      | 0.27  | 0.39  | 0.32  | 0.08  |
| <i>C. sahafaryensis</i>       | IOI : MAD-N       | 8.54          | 2.15  | 1.56      | 0.19  | 0.25  | 0.19  | 0.04  |
| <i>C. tsirananae</i>          | IOI : MAD-N       | 9.85          | 2.92  | 2.07      | 0.35  | 0.48  | 0.29  | 0.09  |
| <i>C. abbayesii</i>           | IOI : MAD-S       | 9.69          | 1.92  | 1.45      | 0.21  | 0.21  | -0.01 | 0.00  |
| <i>C. arenesiana</i>          | IOI : MAD-S       | 7.92          | 1.50  | 1.30      | 0.25  | 0.18  | -0.29 | -0.09 |
| <i>C. bertrandii</i>          | IOI : MAD-S       | 10.62         | 1.92  | 1.36      | 0.20  | 0.20  | 0.01  | 0.00  |
| <i>C. coursiana</i>           | IOI : MAD-S       | 8.54          | 2.00  | 1.61      | 0.29  | 0.27  | -0.06 | -0.01 |
| <i>C. farafanganensis</i>     | IOI : MAD-S       | 7.23          | 2.38  | 1.58      | 0.25  | 0.30  | 0.10  | 0.03  |
| <i>C. kianjavatensis1</i>     | IOI : MAD-S       | 9.69          | 2.77  | 1.99      | 0.28  | 0.34  | 0.13  | 0.04  |
| <i>C. kianjavatensis2</i>     | IOI : MAD-S       | 9.69          | 1.92  | 1.35      | 0.14  | 0.22  | 0.24  | 0.05  |
| <i>C. lancifolia</i>          | IOI : MAD-S       | 9.85          | 2.31  | 1.54      | 0.23  | 0.27  | 0.10  | 0.03  |

|                         |             |       |      |      |      |      |       |       |
|-------------------------|-------------|-------|------|------|------|------|-------|-------|
| <i>C. leroyi</i>        | IOI : MAD-S | 9.85  | 2.15 | 1.49 | 0.25 | 0.26 | 0.06  | 0.01  |
| <i>C. leroyi CF1</i>    | IOI : MAD-S | 4.54  | 1.92 | 1.51 | 0.28 | 0.26 | -0.07 | -0.02 |
| <i>C. leroyi CF2</i>    | IOI : MAD-S | 8.77  | 3.00 | 2.43 | 0.36 | 0.42 | 0.13  | 0.04  |
| <i>C. leroyi CF4</i>    | IOI : MAD-S | 4.62  | 1.31 | 1.18 | 0.12 | 0.11 | -0.13 | -0.01 |
| <i>C. mangoroensis</i>  | IOI : MAD-S | 5.46  | 2.38 | 2.01 | 0.50 | 0.45 | -0.09 | -0.03 |
| <i>C. millotii2</i>     | IOI : MAD-S | 9.85  | 3.23 | 2.43 | 0.31 | 0.40 | 0.14  | 0.05  |
| <i>C. millotii3</i>     | IOI : MAD-S | 9.85  | 2.38 | 1.78 | 0.26 | 0.31 | 0.14  | 0.03  |
| <i>C. millotii4</i>     | IOI : MAD-S | 6.92  | 2.62 | 1.90 | 0.28 | 0.35 | 0.17  | 0.04  |
| <i>C. montis-sacri</i>  | IOI : MAD-S | 9.00  | 2.08 | 1.48 | 0.23 | 0.29 | 0.16  | 0.04  |
| <i>C. perrieri1</i>     | IOI : MAD-S | 9.85  | 2.62 | 1.88 | 0.35 | 0.29 | -0.20 | -0.04 |
| <i>C. perrieri2</i>     | IOI : MAD-S | 8.54  | 2.38 | 1.68 | 0.35 | 0.35 | 0.04  | 0.00  |
| <i>C. perrieri3</i>     | IOI : MAD-S | 5.00  | 1.85 | 1.69 | 0.31 | 0.32 | 0.03  | 0.01  |
| <i>C. perrieri4</i>     | IOI : MAD-S | 9.62  | 1.77 | 1.60 | 0.27 | 0.26 | -0.02 | -0.01 |
| <i>C. resinosa1</i>     | IOI : MAD-S | 9.85  | 2.23 | 1.95 | 0.40 | 0.33 | -0.24 | -0.05 |
| <i>C. resinosa2</i>     | IOI : MAD-S | 9.77  | 2.46 | 1.92 | 0.26 | 0.32 | 0.19  | 0.04  |
| <i>C. richardii</i>     | IOI : MAD-S | 8.54  | 1.62 | 1.34 | 0.23 | 0.16 | -0.32 | -0.04 |
| <i>C. sakarahaе</i>     | IOI : MAD-S | 9.62  | 2.54 | 1.82 | 0.26 | 0.34 | 0.19  | 0.05  |
| <i>C. tetragona</i>     | IOI : MAD-S | 7.46  | 1.54 | 1.24 | 0.13 | 0.14 | 0.12  | 0.01  |
| <i>C. vatovavyensis</i> | IOI : MAD-S | 10.00 | 2.15 | 1.62 | 0.24 | 0.26 | 0.03  | 0.01  |
| <i>C. vianneyi1</i>     | IOI : MAD-S | 10.00 | 1.69 | 1.39 | 0.15 | 0.21 | 0.24  | 0.04  |
| <i>C. vianneyi2</i>     | IOI : MAD-S | 10.00 | 1.46 | 1.46 | 0.44 | 0.23 | -0.91 | -0.14 |
| <i>C.millotii1</i>      | IOI : MAD-S | 10.00 | 2.38 | 1.70 | 0.26 | 0.28 | 0.01  | 0.01  |
| <i>C. bernardiniana</i> | IOI : MAS   | 8.38  | 1.92 | 1.42 | 0.19 | 0.23 | 0.15  | 0.03  |
| <i>C. humblotiana</i>   | IOI : MAS   | 5.00  | 1.23 | 1.12 | 0.08 | 0.08 | 0.07  | 0.00  |
| <i>C. macrocarpa</i>    | IOI : MAS   | 10.54 | 2.38 | 1.68 | 0.28 | 0.29 | 0.10  | 0.01  |
| <i>C. mauritiana</i>    | IOI : MAS   | 9.85  | 2.00 | 1.38 | 0.15 | 0.20 | 0.29  | 0.04  |
| <i>C. myrtifolia</i>    | IOI : MAS   | 7.38  | 1.77 | 1.31 | 0.12 | 0.18 | 0.14  | 0.04  |
| <i>C. anthonyi1</i>     | W/WCA       | 11.69 | 1.62 | 1.39 | 0.10 | 0.13 | 0.35  | 0.02  |
| <i>C. anthonyi2</i>     | W/WCA       | 7.00  | 1.77 | 1.53 | 0.11 | 0.20 | 0.06  | 0.13  |
| <i>C. brevipes1</i>     | W/WCA       | 6.00  | 3.77 | 2.99 | 0.50 | 0.58 | 0.16  | 0.05  |
| <i>C. brevipes2</i>     | W/WCA       | 9.77  | 3.62 | 2.74 | 0.49 | 0.51 | 0.11  | 0.02  |
| <i>C. canephora</i>     | W/WCA       | 13.69 | 4.38 | 2.51 | 0.46 | 0.52 | 0.05  | 0.03  |
| <i>C. canephora1</i>    | W/WCA       | 12.31 | 3.85 | 2.52 | 0.48 | 0.50 | 0.03  | 0.01  |

|                                          |       |       |      |      |      |      |       |       |
|------------------------------------------|-------|-------|------|------|------|------|-------|-------|
| <i>C. canephora</i> 3                    | W/WCA | 6.54  | 2.15 | 1.62 | 0.17 | 0.26 | 0.31  | 0.06  |
| <i>C. canephora</i> 4                    | W/WCA | 12.85 | 4.77 | 3.36 | 0.55 | 0.60 | 0.05  | 0.03  |
| <i>C. canephora-r</i>                    | W/WCA | 7.23  | 3.46 | 2.62 | 0.49 | 0.52 | 0.05  | 0.02  |
| <i>C. congensis</i> 1                    | W/WCA | 7.85  | 2.85 | 1.93 | 0.36 | 0.39 | 0.04  | 0.02  |
| <i>C. congensis</i> 2                    | W/WCA | 6.92  | 2.46 | 1.78 | 0.37 | 0.38 | 0.06  | 0.01  |
| <i>C. congensis</i> 3                    | W/WCA | 9.54  | 4.00 | 2.59 | 0.42 | 0.54 | 0.21  | 0.08  |
| <i>C. humilis</i>                        | W/WCA | 10.62 | 3.23 | 2.41 | 0.42 | 0.48 | 0.22  | 0.05  |
| <i>C. liberica</i> var <i>dewevrei</i>   | W/WCA | 9.46  | 3.46 | 2.59 | 0.45 | 0.47 | 0.04  | 0.01  |
| <i>C. liberica</i> var <i>dewevrei-r</i> | W/WCA | 11.54 | 2.46 | 1.89 | 0.35 | 0.37 | 0.03  | 0.01  |
| <i>C. liberica</i> var <i>liberica</i>   | W/WCA | 10.92 | 3.15 | 1.86 | 0.29 | 0.35 | 0.11  | 0.04  |
| <i>C. sp.Congo</i>                       | W/WCA | 7.38  | 4.15 | 2.96 | 0.35 | 0.56 | 0.35  | 0.13  |
| <i>C. sp.Koto</i>                        | W/WCA | 4.31  | 1.54 | 1.32 | 0.23 | 0.16 | -0.41 | -0.13 |
| <i>C. stenophylla</i> 1                  | W/WCA | 7.69  | 2.38 | 1.58 | 0.23 | 0.30 | 0.26  | 0.05  |
| <i>C. stenophylla</i> 2                  | W/WCA | 10.08 | 2.62 | 1.65 | 0.25 | 0.35 | 0.18  | 0.06  |
| <i>C.sp.Nkoumbala</i>                    | W/WCA | 6.54  | 3.00 | 2.20 | 0.35 | 0.43 | 0.14  | 0.06  |
